# Supplementary material
Source: PubMed Central journal article supplement (PMC8005435)
Supplement: NIHMS1648885-supplement-1.pdf [file NIHMS1648885-supplement-1.pdf]

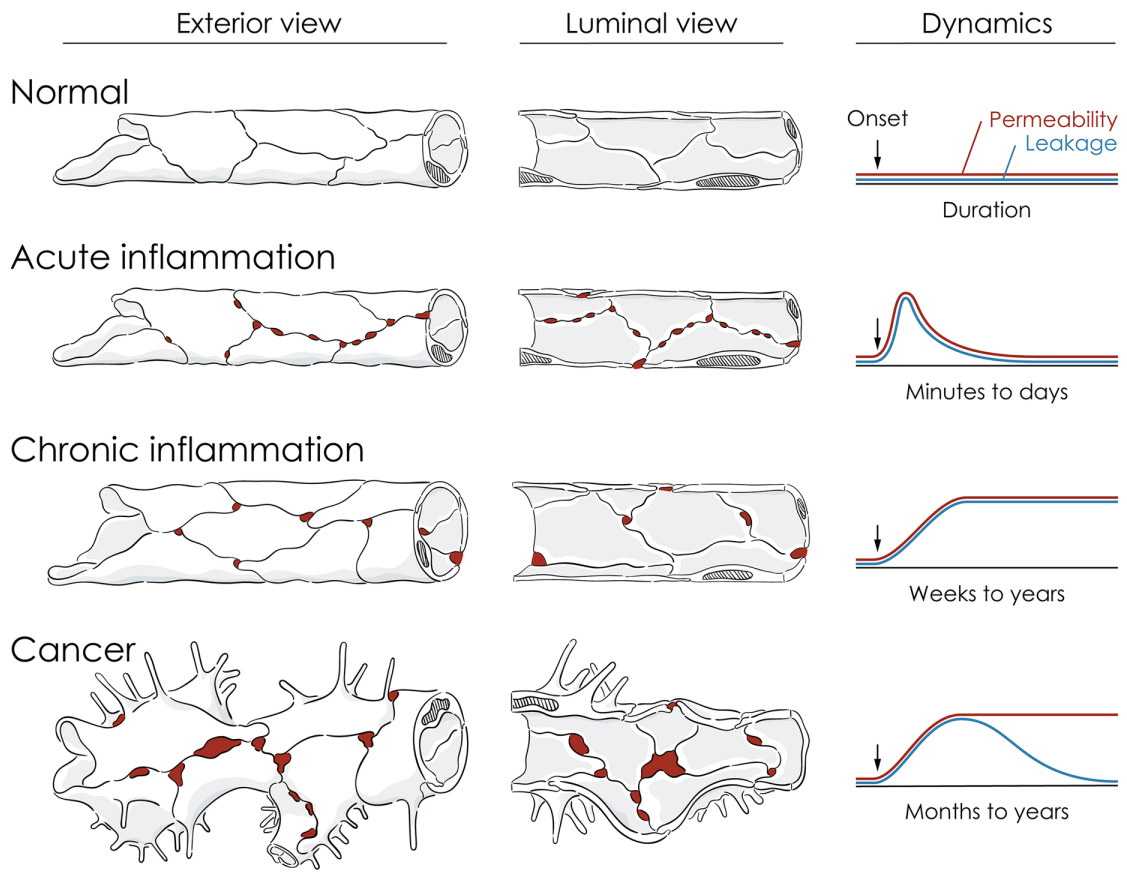

Figure 1

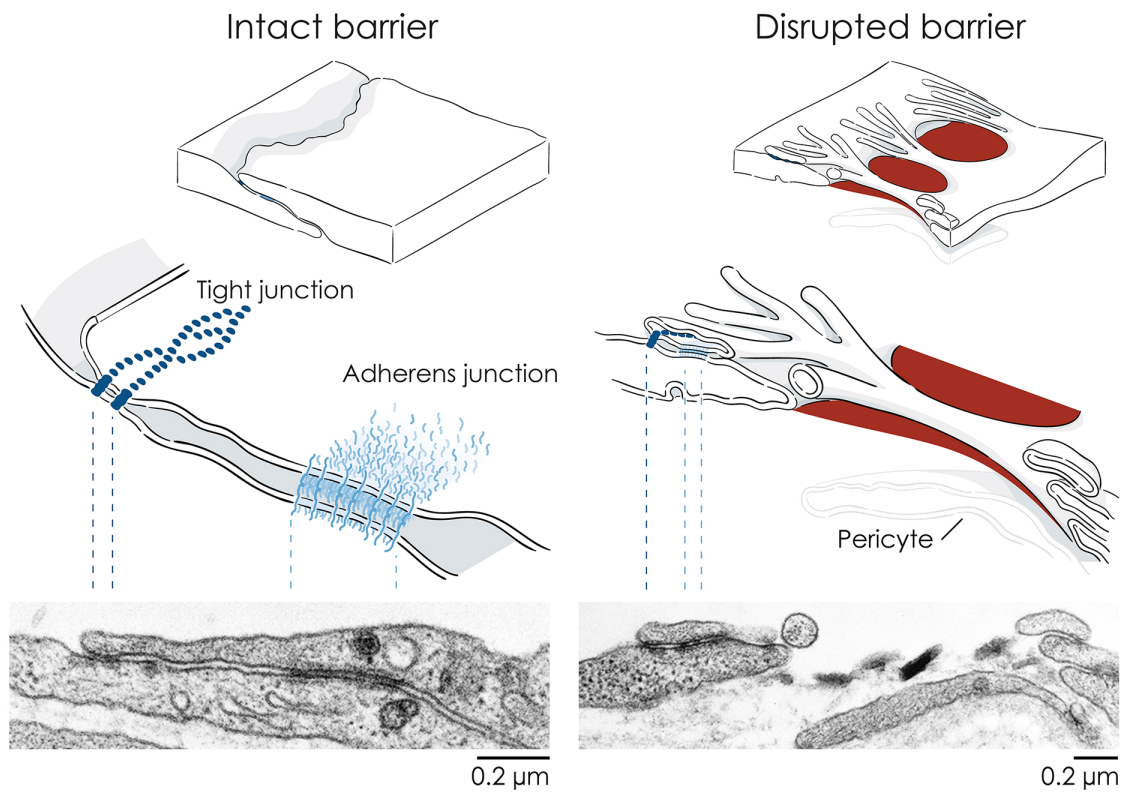

Figure 2

**Barrier closure and stability**

Tight junction

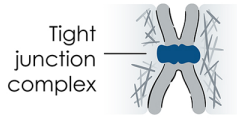

Adherens junction

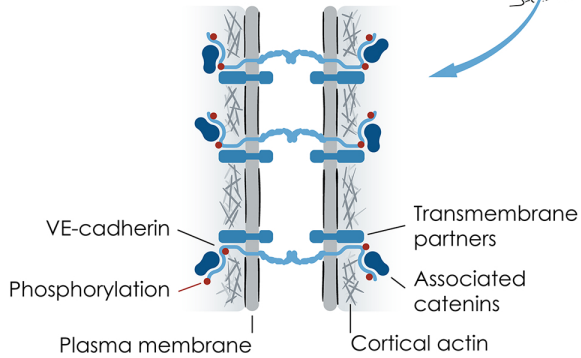

| Ligands                       | Receptors                 | Pathways    |
|-------------------------------|---------------------------|-------------|
| $\beta$ 2-adrenergic agonists | $\beta$ 2-adrenergic GPCR | cAMP        |
| Angpt1                        | Tie2 RTK                  | Rho GTPases |

**Barrier opening**

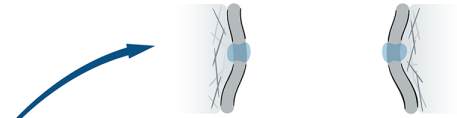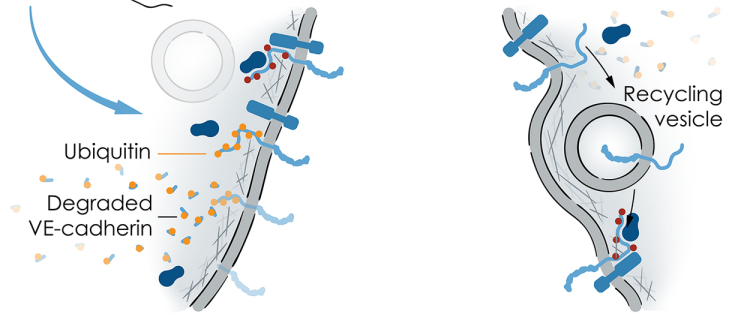

| Ligands    | Receptors       | Pathways                  |
|------------|-----------------|---------------------------|
| Histamine  | Histamine GPCR  | Rho GTPases, NO           |
| Bradykinin | Bradykinin GPCR | Rho GTPases, NO           |
| VEGFA      | VEGFR2 RTK      | Rho GTPases, SFK, FAK, NO |

Figure 3

A Gaps: silver stain  
substance P 3 minutes

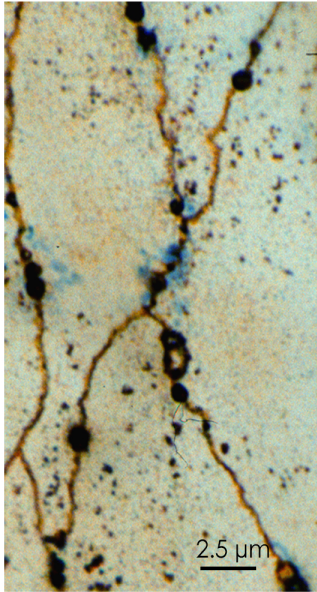

B Gaps: silver stain SEM backscattered (left) &  
secondary electrons (right) substance P 1 minute

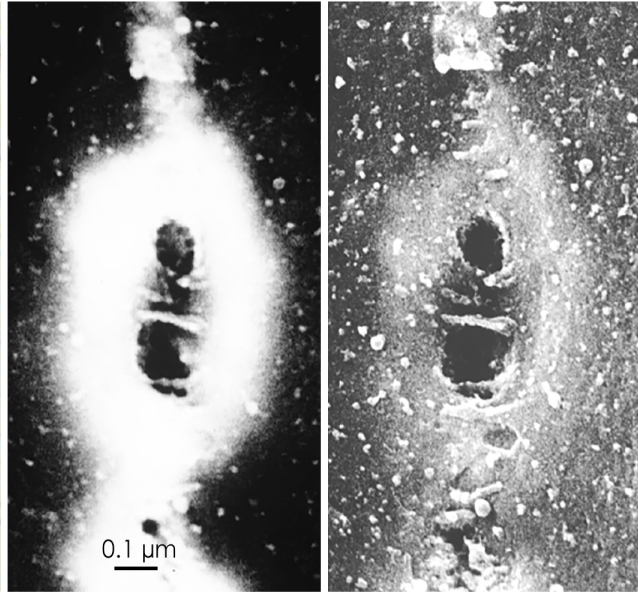

C Endothelial gaps between filopodia: SEM substance P 1 minute

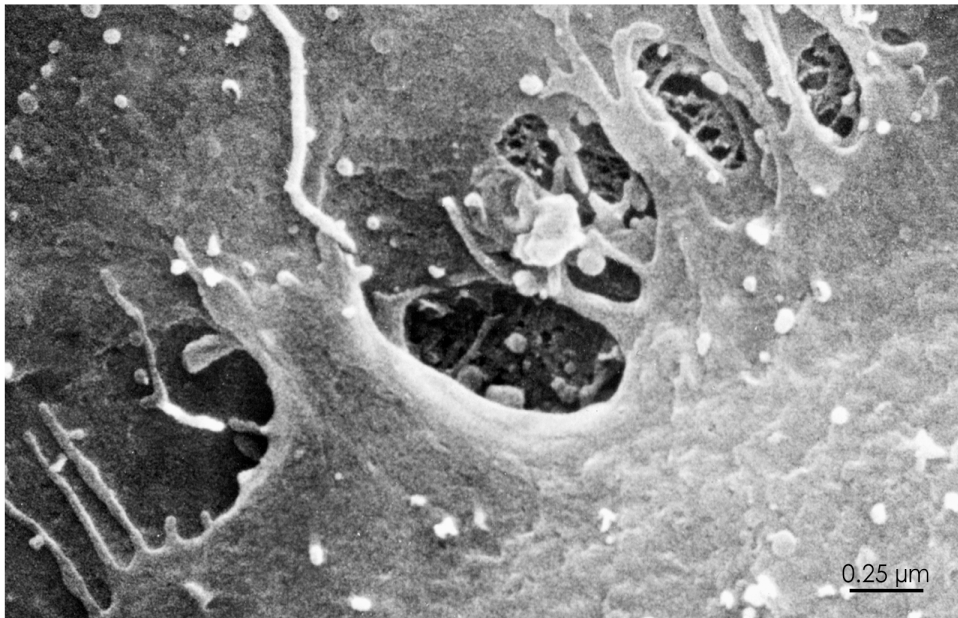

Figure 4

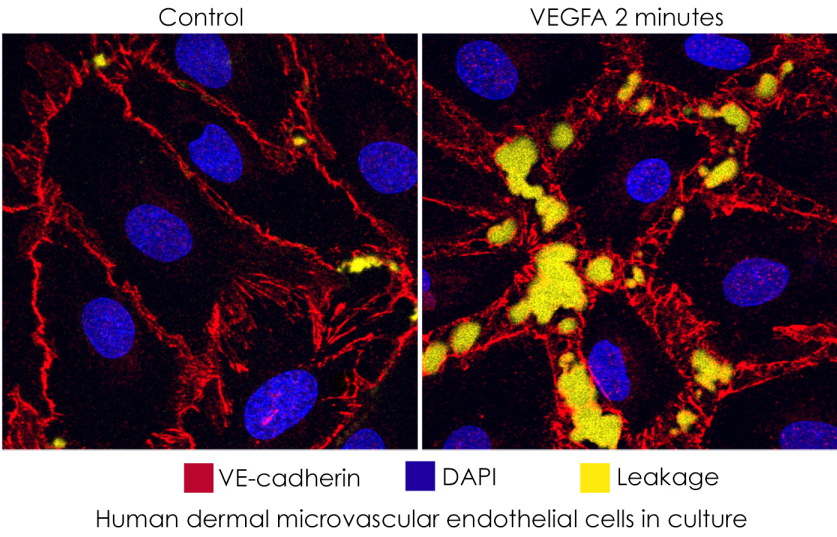

Figure 1 box 1
